# Supplementary material
Source: MDPI journal article supplement (https://www.mdpi.com/2072-4292/12/23/3889)
Supplement: s1 [file s1]

# Nocturnal Surface Urban Heat Island over Greater Cairo: Spatial Morphology, Temporal Trends and Links to Land-Atmosphere Influences

Ahmed M. El Kenawy<sup>1,2,\*</sup>, Mohamed Hereher<sup>1,3</sup>, Sayed M. Robaa<sup>4</sup>, Matthew F. McCabe<sup>5</sup>, Juan I. Lopez-Moreno<sup>6</sup>, Fernando Domínguez-Castro<sup>7,8</sup>, Islam M. Gaber<sup>10</sup>, Talal Al-Awadhi<sup>1</sup>, Ali Al-Buloshi<sup>1</sup>, Noura Al Nasiri<sup>1</sup>, Salim Al-Hatrushi<sup>1</sup>, Petra-Manuela Schuwerack<sup>9</sup>, Dhais Peña-Angulo<sup>6</sup>, Mohamed M. Abdelaal<sup>2</sup> and Sergio M. Vicente-Serrano<sup>6</sup>

<sup>1</sup> Department of Geography, Sultan Qaboos University, Al Khoud, Muscat 123, Oman;

meldesoky@squ.edu.om, mhereher@gmail.com (M.H.); alawadhi@squ.edu.om (T.A.); Buloshis@squ.edu.om (A.A.); noure@squ.edu.om (N.A.); salim.alhatrushi@gmail.com (S.A.)

<sup>2</sup> Department of Geography, Mansoura University 35516, Mansoura, Egypt; mohamedaa@mans.edu.eg

<sup>3</sup> Department of Environmental Sciences, Damietta University, New Damietta 34511, Egypt

<sup>4</sup> Department of Astronomy, Space Science and Meteorology, Faculty of Science, Cairo University 1261, Cairo, Egypt; robaa@sci.cu.edu.eg

<sup>5</sup> Division of Biological and Environmental Sciences and Engineering, King Abdullah University of Science and Technology, Thuwal, Saudi Arabia; Matthew.McCabe@kaust.edu.sa

<sup>6</sup> Instituto Pirenaico de Ecología, Campus de Aula Dei, Avda. Montañana, Zaragoza 50059, Spain; nlopez@ipe.csic.es (J.I.L.M.); dhaispa@gmail.com (D.P.A.); svicen@ipe.csic.es (S.M.V.S.)

<sup>7</sup> Aragonese Agency for Research and Development Researcher (ARAID), Zaragoza 50018, Spain; fdominguez@unizar.es

<sup>8</sup> Department of Geography, University of Zaragoza, Zaragoza 50009, Spain

<sup>9</sup> University of Plymouth at Britannia Royal Naval College, Dartmouth, Devon TQ6 9EN, UK; pschuwerack@gmail.com

<sup>10</sup> GIS Specialist and MA Student, Department of Geography, South Valley University, Qena Branch, Qena 83523, Egypt; islam mohamed1606@gmail.com

\* Correspondence: kenawy@mans.edu.eg

Received: 23 October 2020; Accepted: 25 November 2020; Published: date

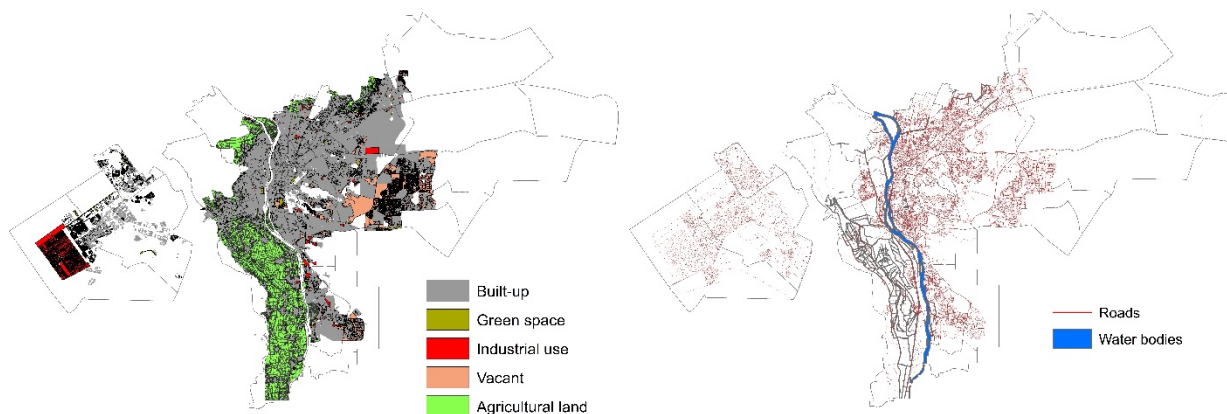

**Figure S1.** Spatial distribution of the dominant LCLU types in Greater Cairo in 2018. The road network and water channels are illustrated separately in the right panel.

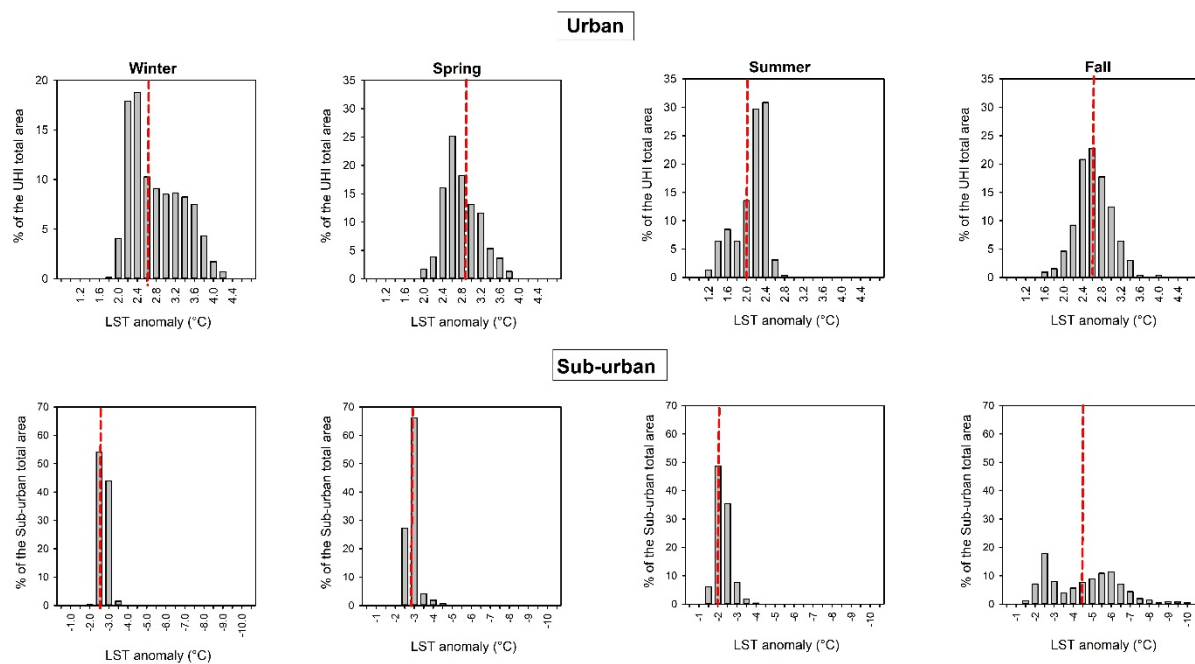

**Figure S2.** Averaged intensity of nighttime LST anomaly over urban and sub-urban areas from 2003 to 2019. The vertical dotted line indicates the mean for all grids.

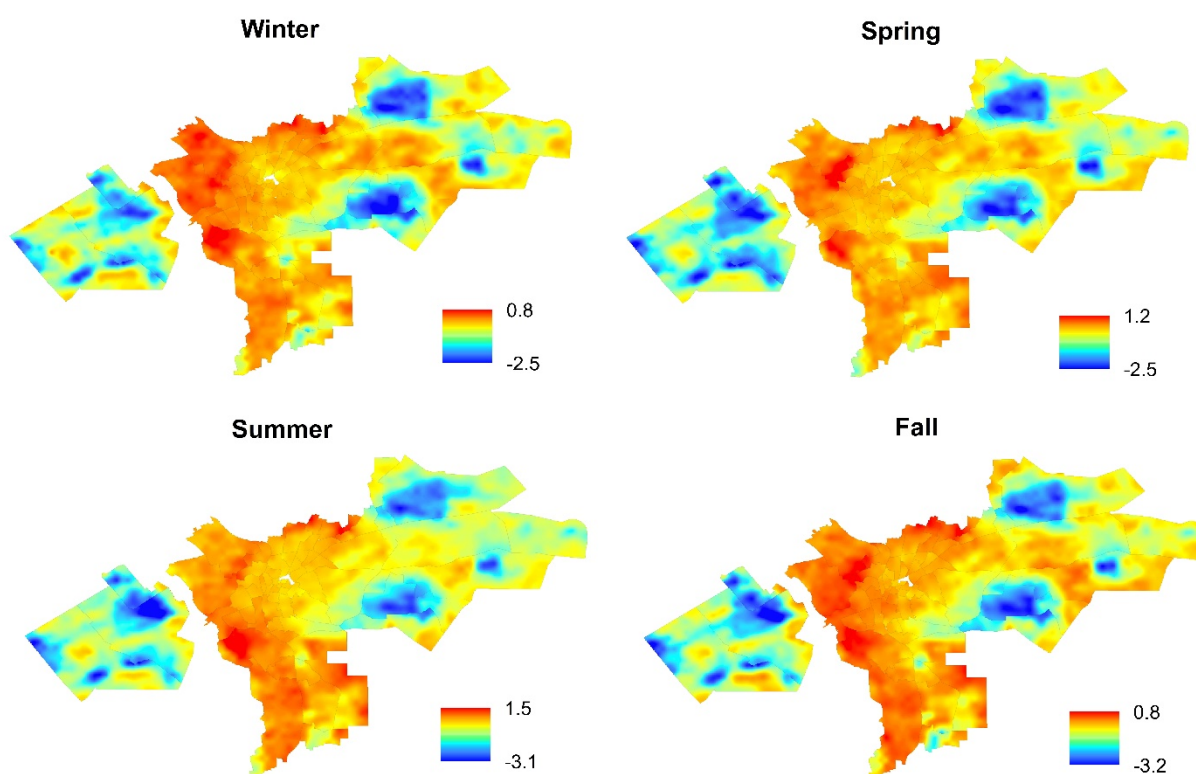

**Figure S3.** Seasonal changes (%/decade) of albedo between 2003 and 2019.

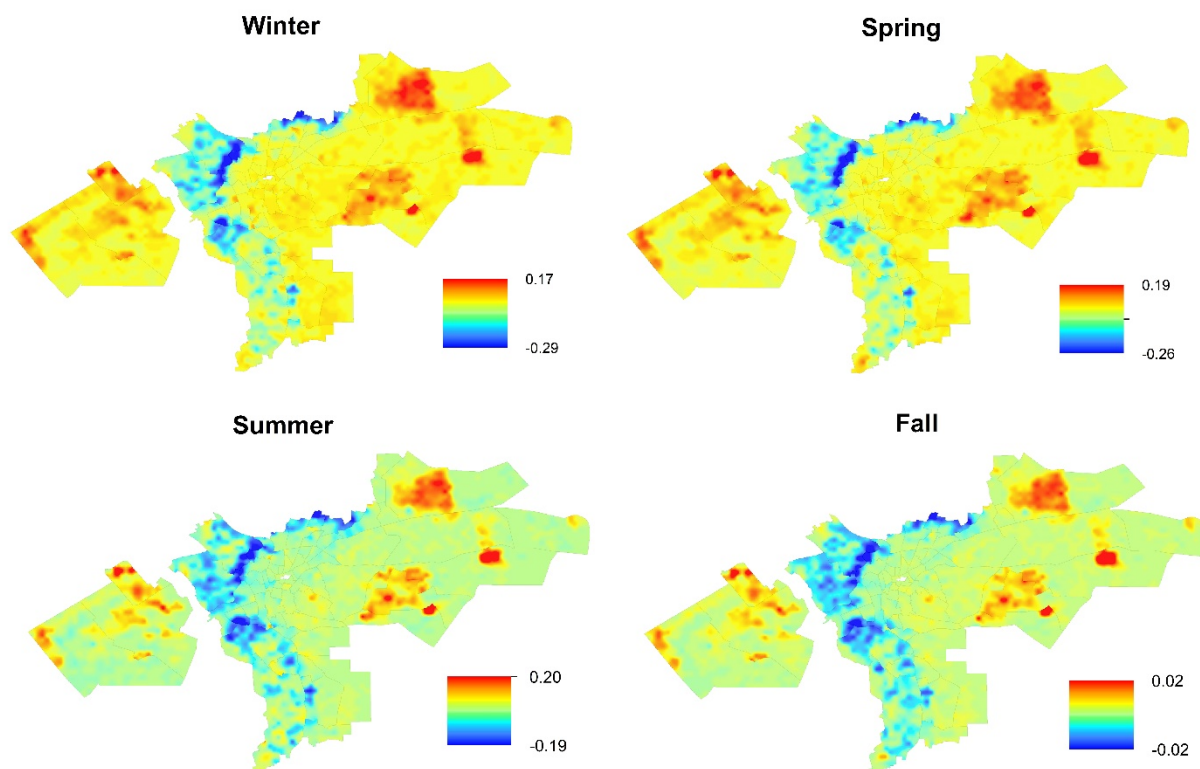

Figure S4. Seasonal changes (index unit/decade) of NDVI between 2003 and 2019.

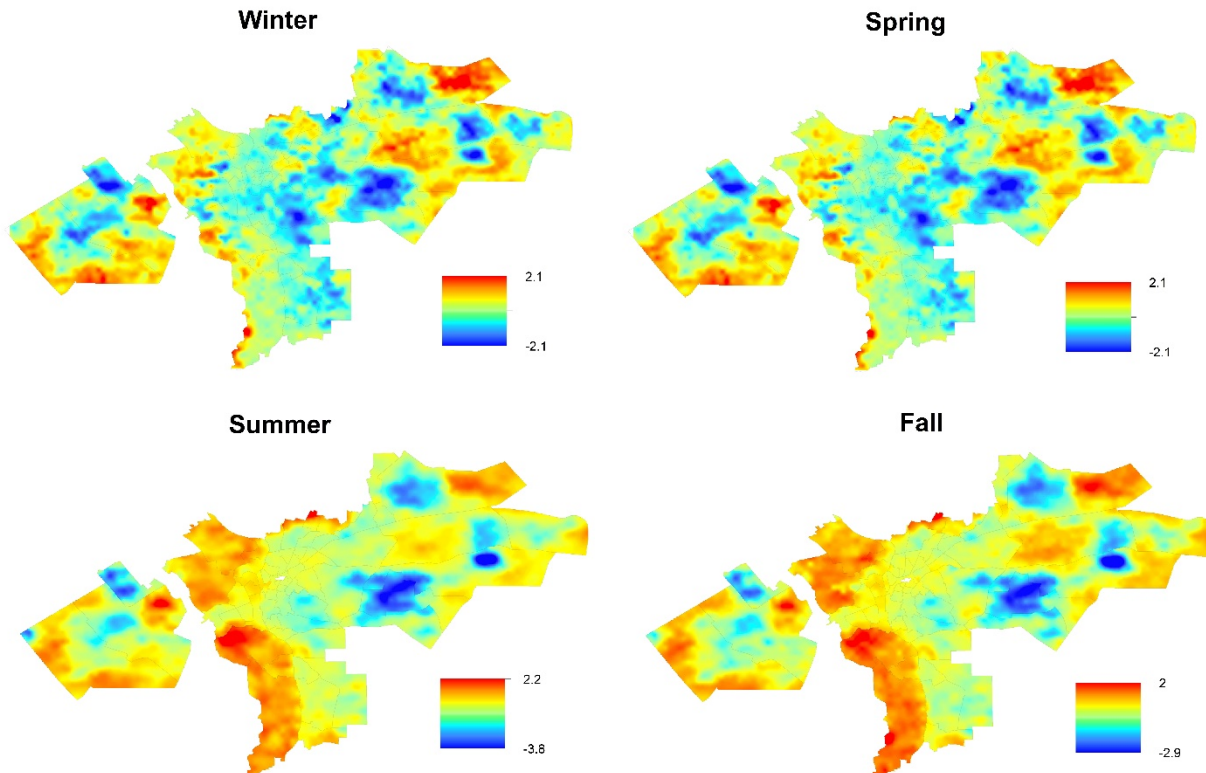

Figure S5. Seasonal changes ( $^{\circ}\text{C}/\text{decade}$ ) of daytime LST between 2003 and 2019.

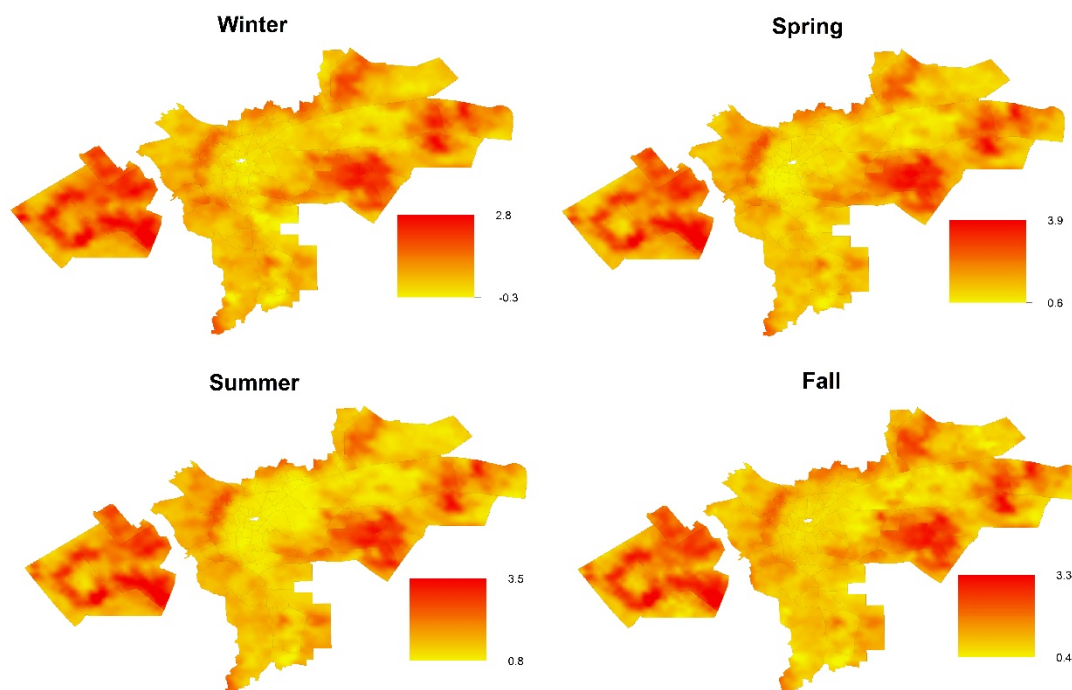

**Figure S6.** Seasonal changes (°C/decade) of nighttime LST between 2003 and 2019.

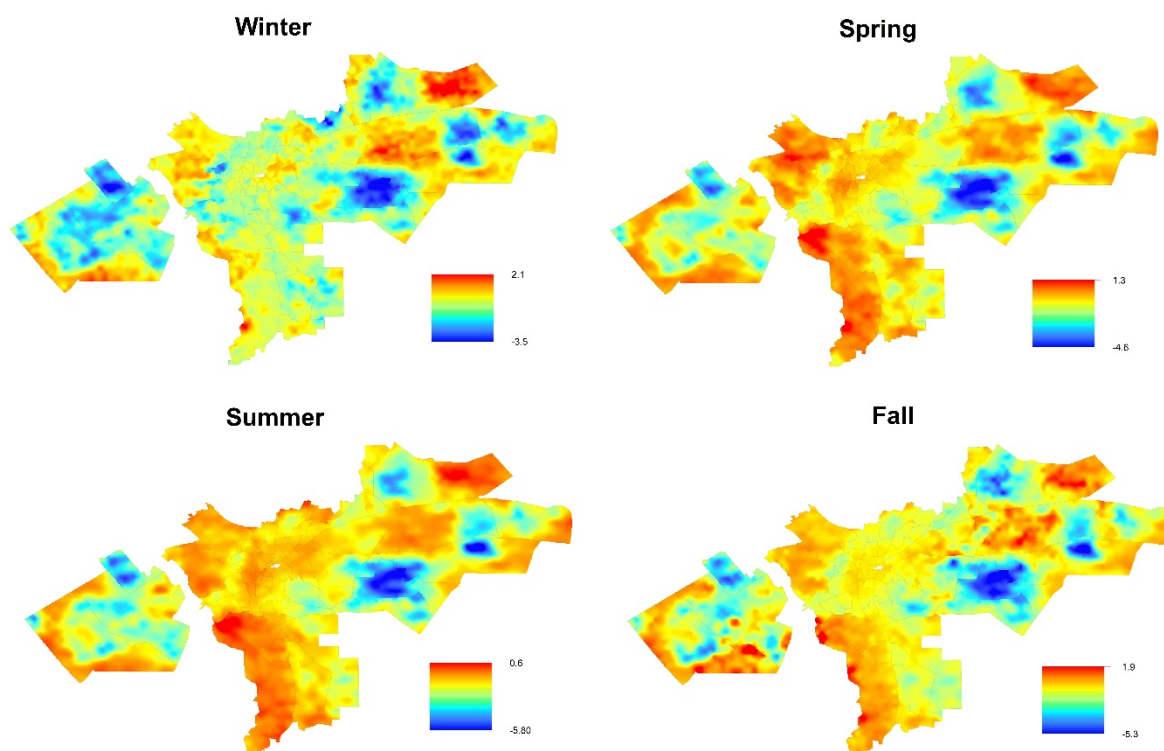

**Figure S7.** Seasonal changes (°C/decade) of DTR between 2003 and 2019.
